# Supplementary material for: Systematic review on coping strategies used by palliative care patients in South Asia
Source: Research Square preprint supplement (doi:10.21203/rs.3.rs-4480982/v1), 2024-06-17
Supplement: Supplementary file 1 [file d3dd122e7e5048094c6d4890.docx]

**Appendix 1: Search strategy**

**Research Question**

What coping strategies are used among Palliative Care Patients in South Asia?

**Search strategy**

The following databases were searched to identify relevant articles, and the results were imported into EndNote:

- PubMed
- EMBASE
- Medline
- Psych Info

**PubMed**

| Hits | Terms | S. No |
| --- | --- | --- |
| [1,928,451](https://pubmed.ncbi.nlm.nih.gov/?term=%28%28%28Coping%29+OR+%28Adjustment%29%29+OR+%28Adaptation%29%29+OR+%28Quality+of+Life%29&sort=) | **(((Coping) OR (Adjustment)) OR (Adaptation)) OR (Quality of Life)** | 1 |
| [1,197,996](https://pubmed.ncbi.nlm.nih.gov/?term=%28%28%28%28Palliative%29+OR+%28Hospice%29%29+OR+%28Incurable%29%29+OR+%28Comfort+care%29%29+OR+%28End+of+life%29&sort=) | **((((Palliative) OR (Hospice)) OR (Incurable)) OR (Comfort care)) OR (End of life)** | 2 |
| [1,124,832](https://pubmed.ncbi.nlm.nih.gov/?term=%28%28%28%28%28%28%28%28India%2A%29+OR+%28Pakistan%2A%29%29+OR+%28Nepal%2A%29%29+OR+%28Bangladesh%2A%29%29+OR+%28Sri+Lanka%2A%29%29+OR+%28Bhutan%2A%29%29+OR+%28Maldives%2A%29%29+OR+%28Afghanistan%2A%29%29+OR+%28South+Asia%2A%29&sort=) | **((((((((India*) OR (Pakistan*)) OR (Nepal*)) OR (Bangladesh*)) OR (Sri Lanka*)) OR (Bhutan*)) OR (Maldives*)) OR (Afghanistan*)) OR (South Asia*)** | 3 |
| [5,521](https://pubmed.ncbi.nlm.nih.gov/?term=%231+AND+%232+AND+%233&sort=) | **#1 AND #2 AND #3** | 4 |

**EMBASE**

| Hits | Terms | S. No |
| --- | --- | --- |
| 1,308,206 | **(Coping or Adjustment or Adaptation or Quality of life)** | 1 |
| 220,367 | **(Palliative or Hospice or Incurable or Comfort Care or End of life)** | 2 |
| 441,367 | **(India* or Pakistan* or Nepal* or Bhutan* or Bangladesh* or Maldives* or Sri Lanka* or Afghanistan* or South Asia*)** | 3 |
| 398 | **#1 AND #2 AND #3** | 4 |

**Medline**

| Hits | Terms | S. No |
| --- | --- | --- |
| 846,113 | **(Coping or Adjustment or Adaptation or Quality of life)** | 1 |
| 118,823 | **(Palliative or Hospice or Incurable or Comfort Care or End of life)** | 2 |
| 268,095 | **(India* or Pakistan* or Nepal* or Bhutan* or Bangladesh* or Maldives* or Sri Lanka* or Afghanistan* or South Asia*)** | 3 |
| 93 | **#1 AND #2 AND #3** | 4 |

**Psych Info**

| Hits | Terms | S. No |
| --- | --- | --- |
| 380,786 | **(Coping or Adjustment or Adaptation or Quality of life)** | 1 |
| 24,814 | **(Palliative or Hospice or Incurable or Comfort Care or End of life)** | 2 |
| 60,551 | **(India* or Pakistan* or Nepal* or Bhutan* or Bangladesh* or Maldives* or Sri Lanka* or Afghanistan* or South Asia*)** | 3 |
| 39 | **#1 AND #2 AND #3** | 4 |
